# Supplementary material for: Impact of cooking methods of red-skinned onion on metabolic transformation of phenolic compounds and gut microbiota changes
Source: Royal Society of Chemistry journal article supplement (doi:10.1039/d3fo00085k), 2023-01-01
Supplement: d3fo00085k1.pdf [file d3fo00085k1.pdf]

## SUPPLEMENTARY MATERIAL

### Impact of cooking methods of red-skinned onion on in vitro colon metabolic transformation of phenolic compounds and gut microbiota changes.

Alice Cattivelli<sup>a,#</sup>, Lorenzo Nissen<sup>b,c,d,#,\*</sup>, Flavia Casciano<sup>b</sup>, Davide Tagliazucchi<sup>a</sup>, Andrea Gianotti<sup>b,c,d,\*</sup>.

<sup>1</sup>Department of Life Sciences, University of Modena and Reggio Emilia, Via Amendola, 2 - Pad. Besta, 42100 Reggio Emilia, Italy.

<sup>2</sup>Department of Agricultural and Food Sciences (DISTAL), *Alma Mater Studiorum* - University of Bologna, Piazza Goidanich 60, 47521 Cesena (FC), Italy.

<sup>3</sup>Interdepartmental Centre of Agri-Food Industrial Research (CIRI), *Alma Mater Studiorum* - University of Bologna, Piazza G. Goidanich 60, 47521 Cesena (FC), Italy.

<sup>4</sup>Centre for Applied Biomedical Research – CRBA, *Alma Mater Studiorum* - Università di Bologna, Policlinico di Sant'Orsola, Via Massarenti 9, 40138 Bologna, Italy.

\*Corresponding authors: LN [lorenzo.nissen@unibo.it](mailto:lorenzo.nissen@unibo.it) AG [andrea.gianotti@unibo.it](mailto:andrea.gianotti@unibo.it)

#These authors have contributed equally

**Table S1.** Primers pairs employed for PCR and qPCR reactions and quantifications.

| Bacterial taxa              | Target | Sequence 3'-5'                 | Bp* | MT**<br>(°C) | Reference |
|-----------------------------|--------|--------------------------------|-----|--------------|-----------|
| <i>Eubacteria</i>           | V3-V4  | Eub518-R: ATTACCGCGGCTGCTGG    | 147 | 57.6         | 82        |
|                             | 16S    | Eub338-F: ACTCCTACGGGAGGCAG    |     | 63.5         |           |
| <i>Firmicutes</i>           | V3-V4  | Firm-F: GGAGYATGTGGTTTAATT     | 300 | 60.5         | 83        |
|                             | 16S    | Firm-R: ACTCCTACGGGAGGCAG      |     | 63.5         |           |
| <i>Bacteroidetes</i>        | V3-V4  | Bact-F: GGARCATGTGGTTTAATT     | 250 | 58.9         | 83        |
|                             | 16S    | Bact-R: AGCTGACGACAACCATG      |     | 59.4         |           |
| <i>Lactobacillales</i>      | V3-V4  | F-Lac: GCAGCAGTAGGGAATCT       | 340 | 59.8         | 84        |
|                             | 16S    | R-Lac: GCATTYCACCGCTACACA      |     | 58.3         |           |
| <i>Bifidobacteriaceae</i>   | RecA   | RecA-F: CGTYTCBCAGCCGGAYA      | 220 | 60.3         | 85        |
|                             |        | RecA-R: CCARVGCRCGGTCATC       |     | 59.2         |           |
| <i>Enterobacteriaceae</i>   | V3-V4  | Enterb-F: TGCCGTAACCTCGGGAG    | 450 | 64.2         | 86        |
|                             | 16S    | Enterb-R: TCAAGGACCAGTGTTTCAG  |     | 60.3         |           |
| <i>Clostridium</i> group I  | V3-V4  | CloSI-F: TACCHRAGGAGGAAGCCAC   | 148 | 54.6         | 86        |
|                             | 16S    | CloSI-R: GTTCTTCTAATCTCTACGCAT |     | 53.0         |           |
| <i>Clostridium</i> group IV | V3-V4  | CloIV-F: TTAACACAATAAGTWATC    | 400 | 58.1         | 87        |
|                             | 16S    | CloIV-R: ACCTTCTCCGTTTTGTC     |     | 57.9         |           |

|                                     |       |                               |     |      |    |
|-------------------------------------|-------|-------------------------------|-----|------|----|
| ATOP group                          | V3-V4 | ATOP-F: GGGTTGAGAGACCGACC     | 190 | 57.6 | 88 |
|                                     | 16S   | ATOP-R: CGGRGCTTCTTCTGCAG     |     | 59.4 |    |
| BPP group                           | V3-V4 | BPP-F: GAGAGGAAGGTCCCCCA      | 140 | 60.5 | 89 |
|                                     | 16S   | BPP-R: CGCKACTTGGCTGGTTCA     |     | 59.9 |    |
| <i>Escherichia coli</i>             | FtsZ  | EcFtsZ-F: GGTATCCTGACCGTTGCT  | 250 | 59.4 | 90 |
|                                     |       | EcFtsZ-R: ATACCTCGGCCAGAACT   |     | 57.3 |    |
| <i>Akkermansia</i>                  | V3-V4 | AkM1: CAGCACGTGAAGGTGGG       | 327 | 63.5 | 91 |
| <i>muciniphila</i>                  | 16S   | AkM2: CCTTGCGGTTGGCTTCA       |     | 59.4 |    |
| <i>Bifidobacterium longum</i>       | V3-V4 | Blon-F: GATTCTGGCTCAGGATGA    | 220 | 62.1 | 92 |
|                                     | 16S   | Blon-R: CTGATAGGACGCGACCC     |     | 61.4 |    |
| <i>Faecalibacterium prausnitzii</i> | V3-V4 | Fprau223-F: GATGGCCTCGCGTCCGA | 199 | 63.7 | 93 |
|                                     | 16S   | Fprau420-R: CCGAAGACCTTCTCCTC |     | 58.8 |    |

\*Base pairs, \*\*Melting Temperature.

### Supplementary References

82 D. J. Lane, A. P. Jr. Harrison, D. Stahl, B. Pace, S. J. Giovannoni, G. J. Olsen, N. R. Pace, Evolutionary relationships among sulfur- and iron-oxidizing eubacteria, *J. Bacteriol.*, 1992, **174(1)**, 269-278.

83 X. Guo, X. Xia, R. Tang, J. Zhou, H. Zhao, K. Wang, Development of a real-time PCR method for Firmicutes and Bacteroidetes in faeces and its application to quantify intestinal population of obese and lean pigs, *Lett. Appl. Microbiol.*, 2008, **47(5)**, 367-73.

84 J. Walter, C. Hertel, G. W. Tannock, C. M. Lis, K. Munro, W. P. Hammes, Detection of *Lactobacillus*, *Pediococcus*, *Leuconostoc*, and *Weissella* species in human feces by using group-specific PCR primers and Denaturing Gradient Gel Electrophoresis, *Appl. Environ. Microbiol.*, 2001, **67(6)**, 2578-2585.

85 L. Masco, M. Ventura, R. Zink, G. Huys, J. Swings, Polyphasic taxonomic analysis of *Bifidobacterium animalis* and *Bifidobacterium lactis* reveals relatedness at the subspecies level: reclassification of *Bifidobacterium animalis* as *Bifidobacterium animalis* subsp. *animalis* subsp. nov. and *Bifidobacterium lactis* as *Bifidobacterium animalis* subsp. *lactis* subsp. nov., *Int. J. Syst. Evol. Microbiol.*, 2004, **54**, 1137-1143.

86 S. Bartosch, A. Fite, G. T. Macfarlane, M. E. McMurdo, Characterization of bacterial communities in feces from healthy elderly volunteers and hospitalized elderly patients by using real-time PCR and effects of antibiotic treatment on the faecal microbiota, *Appl. Environ. Microbiol.*, 2004, **70(6)**, 3575-81.

87 E. Goldberg, I. Amir, M. Zafran, U. Gophna, Z. Samra, S. Pitlik, J. Bishara, The correlation between *Clostridium difficile* infection and human gut concentrations of *Bacteroidetes* phylum and clostridial species, *Eur. J. Clin. Microbiol. Infect. Dis.*, 2014, **33(3)**, 377-83.

- 88 P. Zhou, C. E. Helmstetter, Relationship between *ftsZ* gene expression and chromosome replication in *Escherichia coli*, *J. Bacteriol.*, 1994, **176**, 6100–6106.
- 89 X. Guo, J. Zhang, F. Wu, M. Zhang, M. Yi, Y. Peng, Different subtype strains of *Akkermansia muciniphila* abundantly colonize in southern China, *J. Appl. Microbiol.*, 2016, **120**, 452–459.
- 90 T. Matsuki, K. Watanabe, J. Fujimoto, T. Takada, R. Tanaka, Use of 16S rRNA gene-targeted group-specific primers for real-time PCR analysis of predominant bacteria in human feces, *Appl. Environ. Microbiol.*, 2004, **70(12)**, 7220-7228.
- 91 B. D. Pachikian, A. M. Neyrinck, L. Portois, F. C. De Backer, F. M. Sohet, M. Hacquebard, Y. A. Carpentier, P. D. Cani, N. M. Delzenne, Involvement of gut microbial fermentation in the metabolic alterations occurring in n-3 polyunsaturated fatty acids-depleted mice, *Nutr. Metabol.*, 2011, **8(1)**, 1-11.
- 92 J. Chen, W. Cai, Y. Feng, Development of intestinal bifidobacteria and lactobacilli in breast fed neonates, *Clin. Nutr.*, 2007, **26**, 559–566.
- 93 R. F. Wang, W. W. Cao, C. E. Cerniglia, PCR detection and quantitation of predominant anaerobic bacteria in human and animal fecal samples, *Appl. Environ. Microbiol.*, 1996, **62**, 1242–1247.
